# Supplementary material for: The structural connectivity of subthalamic deep brain stimulation correlates with impulsivity in Parkinson’s disease
Source: Oxford University Press journal article supplement (doi:10.1093/brain/awaa148), 2020-04-24
Supplement: awaa148_supplementary_data.zip [file awaa148_supplementary_data.zip]

## Supplementary Information: Results

### The Structural Connectivity of Subthalamic Deep Brain Stimulation Correlates with Impulsivity in Parkinson's

Philip E. Mosley <sup>1,2,3,4</sup>, Saeed Paliwal <sup>5</sup>, Katherine Robinson <sup>1</sup>, Terry Coyne <sup>3,6</sup>, Peter Silburn <sup>2,3</sup>, Marc Tittgemeyer <sup>7</sup>, Klaas E. Stephan <sup>5,7,8</sup>, Alistair Perry <sup>1,9,10</sup> †, Michael Breakspear <sup>1,11</sup> †

<sup>1</sup> Systems Neuroscience Group, QIMR Berghofer Medical Research Institute, Herston, Queensland, Australia

<sup>2</sup> Neurosciences Queensland, St Andrew's War Memorial Hospital, Spring Hill, Queensland, Australia

<sup>3</sup> Queensland Brain Institute, University of Queensland, St Lucia, Queensland, Australia

<sup>4</sup> Faculty of Medicine, University of Queensland, Herston, Queensland, Australia

<sup>5</sup> Translational Neuromodeling Unit (TNU), Institute for Biomedical Engineering, University of Zürich and Swiss Federal Institute of Technology (ETH Zürich), Zürich, Switzerland

<sup>6</sup> Brizbrain and Spine, the Wesley Hospital, Auchenflower, Queensland, Australia

<sup>7</sup> Max Planck Institute for Metabolism Research, Cologne, Germany.

<sup>8</sup> Wellcome Centre for Human Neuroimaging, University College London, London, UK

<sup>9</sup> Max Planck UCL Centre for Computational Psychiatry and Ageing Research, Berlin, Germany

<sup>10</sup> Centre for Lifespan Psychology, Max Planck Institute for Human Development, Berlin, Germany

<sup>11</sup> Brain and Mind Priority Research Centre, Hunter Medical Research Institute, University of Newcastle, NSW, Australia

† Co-senior author

Correspondence to:

Dr Philip E Mosley, Neurosciences Queensland, Level 1, St Andrew's Place, 33 North Street, Spring Hill, Queensland, 4000, Australia

E-mail:

philip.mosley@qimrberghofer.edu.au

Telephone:

+61 (7) 3839 3688

**Supplementary Table 1 | Details of Participants Developing Clinically-Significant Neuropsychiatric Symptoms (Cases)**

| ID  | Gender | Presenting Symptoms                                                                                                      | DBS Manipulation                                                                                                                                |
|-----|--------|--------------------------------------------------------------------------------------------------------------------------|-------------------------------------------------------------------------------------------------------------------------------------------------|
| 1*^ | Male   | Euphoria, hypersexuality, loss of empathy, rapid speech, verbal disinhibition, marital discord.                          | Active contact on both electrodes moved dorsally & amplitude reduced. Bipolar configuration employed on right STN electrode.                    |
| 2*^ | Male   | Irritability, hypersexuality, rapid speech, marital breakdown.                                                           | Active contact on left STN electrodes moved dorsally. Bipolar configuration employed on right STN electrode. Amplitude reduced both electrodes. |
| 3^  | Male   | Irritability, hypersexuality, aggression, marital breakdown.                                                             | Amplitude in both electrodes reduced.                                                                                                           |
| 4^  | Male   | Reckless decision making (real-estate), loss of empathy, marital discord.                                                | Active contact on both electrodes moved dorsally & amplitude reduced. Bipolar configuration employed on right STN electrode.                    |
| 5^  | Female | Irritability, verbal disinhibition, marital discord.                                                                     | Amplitude in both electrodes reduced.                                                                                                           |
| 6*^ | Male   | Irritability, psychomotor agitation, reduced need for sleep, rapid speech, aggression.                                   | Active contact on right STN electrode moved dorsally. Bipolar configuration both electrodes.                                                    |
| 7^  | Male   | Irritability, hypersexuality, divorced spouse.                                                                           | Bipolar configuration employed on right STN electrode.                                                                                          |
| 8*^ | Female | Irritability, compulsive shopping (second-hand goods), marital breakdown.                                                | Active contact on both electrodes moved dorsally.                                                                                               |
| 9^  | Male   | Euphoria, left spouse for a new relationship.                                                                            | Active contact on right STN electrode moved dorsally and bipolar configuration employed.                                                        |
| 10^ | Female | Euphoria, irritability, compulsive shopping (internet).                                                                  | Active contact on right STN electrode moved dorsally and bipolar configuration employed.                                                        |
| 11^ | Female | Irritability, psychomotor agitation, reduced need for sleep.                                                             | Active contact on right STN electrode moved dorsally & amplitude reduced.                                                                       |
| 12  | Female | Irritability, emotional lability, pressured speech, reduced need for sleep, compulsive internet use.                     | Amplitude in both electrodes reduced.                                                                                                           |
| 13  | Male   | Verbal disinhibition, hypersexuality, alcohol abuse.                                                                     | Amplitude in both electrodes reduced.                                                                                                           |
| 14  | Female | Increased goal-directed activity, compulsive shopping (motorbikes), hobbyism, reckless driving, obtained new tattoos.    | Active contact on right STN electrode moved dorsally; current steering used to avoid medial STN.                                                |
| 15  | Female | Irritability, uncharacteristic swearing, compulsive shopping (furniture).                                                | Active contact on right electrode moved dorsally.                                                                                               |
| 16  | Male   | Use of pornography & adult dating websites, impulsive travel overseas, impulsive financial decisions, marital breakdown. | Active contact on right electrode moved dorsally and bipolar configuration employed. Amplitude in both electrodes reduced.                      |
| 17  | Male   | Euphoria, impulsively left work to start own business leading to financial hardship.                                     | Amplitude in both electrodes reduced.                                                                                                           |

\*These participants reported in more detail in (Mosley *et al.*, 2019).

^These participants included in (Mosley *et al.*, 2018).

**Supplementary Table 2 | Stimulation Parameter Changes for Participants Developing Clinically-Significant Neuropsychiatric Symptoms (Cases)\***

| ID | Subthalamic Stimulation at Onset of Neuropsychiatric Symptoms                                                                         | Subthalamic Stimulation at 3-Month Follow Up after Remission of Acute Symptoms                                             |
|----|---------------------------------------------------------------------------------------------------------------------------------------|----------------------------------------------------------------------------------------------------------------------------|
| 1  | Medtronic:<br>Right STN: Case + 9- / 2.3 V / 60 $\mu$ s / 130 Hz<br>Left STN: Case + 1- / 1.6 V / 60 $\mu$ s / 130 Hz                 | Right STN: 9+ 10- / 2.1 V / 60 $\mu$ s / 130 Hz<br>Left STN: Case + 2- / 1.7 V / 60 $\mu$ s / 130 Hz                       |
| 2  | Boston Scientific:<br>Right STN: Case + 10- / 1.8 mA / 60 $\mu$ s / 130 Hz<br>Left STN: Case + 2- / 3.2 mA / 60 $\mu$ s / 130 Hz      | Right STN: 9 + 10- / 1.7 mA / 60 $\mu$ s / 130 Hz<br>Left STN: Case + 3- / 2.7 mA / 60 $\mu$ s / 130 Hz                    |
| 3  | Medtronic:<br>Right STN: Case + 9- / 2.6 V / 60 $\mu$ s / 130 Hz<br>Left STN: Case + 1- / 2.6 V / 60 $\mu$ s / 130 Hz                 | Right STN: Case + 9- / 2.2 V / 60 $\mu$ s / 130 Hz<br>Left STN: Case + 1- / 2.2 V / 60 $\mu$ s / 130 Hz                    |
| 4  | Boston Scientific:<br>Right STN: Case + 9- / 2.6 mA / 60 $\mu$ s / 130 Hz<br>Left STN: Case + 2- / 2.6 mA / 60 $\mu$ s / 130 Hz       | Right STN: 10+ 11- / 1.7 mA / 60 $\mu$ s / 130 Hz<br>Left STN: Case + 3- / 1.8 mA / 60 $\mu$ s / 130 Hz                    |
| 5  | Boston Scientific:<br>Right STN: Case + 9- / 3.0 mA / 60 $\mu$ s / 130 Hz<br>Left STN: Case + 1- / 3.0 mA / 60 $\mu$ s / 130 Hz       | Right STN: Case + 9- / 2.6 mA / 60 $\mu$ s / 130 Hz<br>Left STN: Case + 1- / 2.6 mA / 60 $\mu$ s / 130 Hz                  |
| 6  | Medtronic:<br>Right STN: Case + 9- / 2.0 V / 60 $\mu$ s / 130 Hz<br>Left STN: Case + 2- / 2.8 V / 60 $\mu$ s / 130 Hz                 | Right STN: 10+ 11- / 2.1 V / 60 $\mu$ s / 130 Hz<br>Left STN: 1+ 2- / 2.9 V / 60 $\mu$ s / 130 Hz                          |
| 7  | Boston Scientific:<br>Right STN: Case + 10- / 2.5 mA / 60 $\mu$ s / 130 Hz<br>Left STN: Case + 3- / 2.7 mA / 60 $\mu$ s / 130 Hz      | Right STN: 9+ 10- 12- / 2.7 mA / 60 $\mu$ s / 130 Hz<br>Left STN: Case + 3- / 2.0 mA / 60 $\mu$ s / 130 Hz                 |
| 8  | Boston Scientific:<br>Right STN: Case + 11- / 1.7 mA / 60 $\mu$ s / 130 Hz<br>Left STN: Case + 3- / 1.6 mA / 60 $\mu$ s / 130 Hz      | Right STN: Case + 12- / 1.9 mA / 60 $\mu$ s / 130 Hz<br>Left STN: Case + 5- / 1.8 mA / 60 $\mu$ s / 130 Hz                 |
| 9  | Boston Scientific:<br>Right STN: Case + 10- / 2.5 mA / 60 $\mu$ s / 130 Hz<br>Left STN: Case + 2- / 1.9 mA / 60 $\mu$ s / 130 Hz      | Right STN: 10+ 11- / 3.4 mA / 60 $\mu$ s / 130 Hz<br>Left STN: Case + 2- / 2.3 mA / 60 $\mu$ s / 130 Hz                    |
| 10 | Boston Scientific:<br>Right STN: Case + 10- / 1.7 mA / 60 $\mu$ s / 130 Hz<br>Left STN: Case + 2- / 1.6 mA / 60 $\mu$ s / 130 Hz      | Right STN: 11+ 12- / 2.0 mA / 60 $\mu$ s / 130 Hz<br>Left STN: Case + 2- / 1.7 mA / 60 $\mu$ s / 130 Hz                    |
| 11 | Boston Scientific:<br>Right STN: Case + 10- / 2.7 mA / 60 $\mu$ s / 130 Hz<br>Left STN: Case + 2- / 1.2 mA / 60 $\mu$ s / 130 Hz      | Right STN: Case + 11- / 2.4 mA / 60 $\mu$ s / 130 Hz<br>Left STN: Case + 2- / 1.2 mA / 60 $\mu$ s / 130 Hz                 |
| 12 | Boston Scientific:<br>Right STN: Case + 10- / 2.9 mA / 60 $\mu$ s / 130 Hz<br>Left STN: Case + 2- / 2.8 mA / 60 $\mu$ s / 130 Hz      | Right STN: Case + 10- / 2.6 mA / 60 $\mu$ s / 130 Hz<br>Left STN: Case + 2- / 2.5 mA / 60 $\mu$ s / 130 Hz                 |
| 13 | Boston Scientific:<br>Right STN: Case + 10- / 3.9 mA / 60 $\mu$ s / 130 Hz<br>Left STN: Case + 2- / 2.8 mA / 60 $\mu$ s / 130 Hz      | Right STN: Case + 10- / 3.2 mA / 60 $\mu$ s / 130 Hz<br>Left STN: Case + 2- / 2.4 mA / 60 $\mu$ s / 130 Hz                 |
| 14 | Abbott:<br>Right STN: Case + 10- (a+b+c) / 2.5 mA / 60 $\mu$ s / 130 Hz<br>Left STN: Case + 3- (b) / 2.5 mA / 60 $\mu$ s / 130 Hz     | Right STN: Case + 11- (a+b) / 2.0 mA / 60 $\mu$ s / 130 Hz<br>Left STN: Case + 3- (b) / 2.5 mA / 60 $\mu$ s / 130 Hz       |
| 15 | Boston Scientific:<br>Right STN: Case + 10- / 1.5 mA / 60 $\mu$ s / 130 Hz<br>Left STN: Case + 2- 3- / 1.5 mA / 60 $\mu$ s / 130 Hz   | Right STN: Case + 11- / 1.6 mA / 60 $\mu$ s / 130 Hz<br>Left STN: Case + 2- 3- / 1.9 mA / 60 $\mu$ s / 130 Hz              |
| 16 | Boston Scientific:<br>Right STN: Case + 10- / 2.5 mA / 60 $\mu$ s / 130 Hz<br>Left STN: Case + 2- / 2.5 mA / 60 $\mu$ s / 130 Hz      | Right STN: 10+ 11- / 2.3 mA / 60 $\mu$ s / 130 Hz<br>Left STN: Case + 2- / 2.2 mA / 60 $\mu$ s / 130 Hz                    |
| 17 | Abbott:<br>Right STN: Case + 11- (a+b+c) / 2.0 mA / 60 $\mu$ s / 130 Hz<br>Left STN: Case + 2- (a+b+c) / 1.5 mA / 60 $\mu$ s / 130 Hz | Right STN: Case + 11- (a+b+c) / 1.5 mA / 60 $\mu$ s / 130 Hz<br>Left STN: Case + 2- (a+b+c) / 1.3 mA / 60 $\mu$ s / 130 Hz |

\*Electrode contacts are specified as follows:

Medtronic: 0-3 (left) and 8-11 (right) in ventral to dorsal direction

Boston Scientific: 1-8 (left) and 9-16 (right) in ventral to dorsal direction

Abbott: 1-4 (left) and 9-12 (right) in ventral to dorsal direction. Contacts 2 & 3 on the left electrode and contacts 10 & 11 on the right electrode are divided into three segments (a, b & c).

When reporting stimulation parameters, Case + indicates the implantable pulse generator is set as the anode and monopolar stimulation is being delivered. Bipolar stimulation results from activation of a separate electrode contact as the anode adjacent to the cathode. This configuration delivers a more focussed stimulation field.

**Supplementary Table 3 | Postoperative Demographic, Neuropsychiatric Variables & Gambling Behaviours by Post-DBS Caseness & Pre-DBS ICB status**

| Demographic, Neuropsychiatric & Gambling Variables Assessed Post-DBS |                                              |                                                 |
|----------------------------------------------------------------------|----------------------------------------------|-------------------------------------------------|
| Demographic Variable                                                 | Case+ vs. Case- †                            | ICB+ vs. ICB- †                                 |
| Gender                                                               | $\chi^2 (1) = 0.15$<br><i>corr. p</i> = 0.70 | $\chi^2 (1) = 7.20$<br><i>corr. p</i> = 0.044 * |
| Age (Years)                                                          | $t = 1.10$<br><i>corr. p</i> = 0.41          | $t = 2.78$<br><i>corr. p</i> = 0.044 *          |
| Hoehn & Yahr Stage                                                   | $t = -1.03$<br><i>corr. p</i> = 0.41         | $t = -1.54$<br><i>corr. p</i> = 0.35            |
| Years Since Diagnosis                                                | $t = 1.09$<br><i>corr. p</i> = 0.41          | $t = -0.80$<br><i>corr. p</i> = 0.49            |
| Assessment Instrument                                                | Case+ vs. Case- †                            | ICB+ vs. ICB- †                                 |
| Levodopa equiv. daily dose                                           | $t = -1.50$<br><i>corr. p</i> = 0.47         | $t = -1.85$<br><i>corr. p</i> = 0.24            |
| BIS Attentional                                                      | $t = 2.41$<br><i>corr. p</i> = 0.20          | $t = -1.52$<br><i>corr. p</i> = 0.25            |
| BIS Non-Planning                                                     | $t = -0.42$<br><i>corr. p</i> = 0.85         | $t = -0.56$<br><i>corr. p</i> = 0.67            |
| BIS Motor                                                            | $t = -0.051$<br><i>corr. p</i> = 0.96        | $t = -1.52$<br><i>corr. p</i> = 0.25            |
| QUIP-RS Total                                                        | $t = 1.16$<br><i>corr. p</i> = 0.54          | $t = -2.37$<br><i>corr. p</i> = 0.13            |
| Delay Discount <i>k</i>                                              | $t = 0.68$<br><i>corr. p</i> = 0.83          | $t = 2.64$<br><i>corr. p</i> = 0.11             |
| Hayling AB Error Score                                               | $t = -0.49$<br><i>corr. p</i> = 0.85         | $t = -0.53$<br><i>corr. p</i> = 0.67            |
| ELF Rule Violations                                                  | $t = -1.13$<br><i>corr. p</i> = 0.54         | $t = -0.82$<br><i>corr. p</i> = 0.60            |
| Virtual Casino                                                       | Case+ vs. Case- †                            | ICB+ vs. ICB- †                                 |
| Average Bet Size (AUD)                                               | $t = 0.096$<br><i>corr. p</i> = 0.96         | $t = -1.46$<br><i>corr. p</i> = 0.25            |
| Double or Nothing Gamble (Percent)                                   | $t = 2.07$<br><i>corr. p</i> = 0.24          | $t = -0.26$<br><i>corr. p</i> = 0.80            |

† FDR-corrected with Benjamini and Hochberg method (1995), with  $\alpha = 0.05$ .

\* $p < 0.05$ . \*\* $p < 0.01$ . \*\*\* $p < 0.001$

BIS = Barratt Impulsiveness Scale; ELF = Excluded Letter Fluency Task; ICB = Impulse Control Behaviours; QUIP-RS = Questionnaire for Impulsive-Compulsive disorders in PD Rating Scale

---

**Supplementary Table 4 | Connectivity Weights in Response Inhibition Latent Variable  
BIS**

---

| Fibre Tract     | Weight |
|-----------------|--------|
| Left VAT - IFG  | -0.88  |
| Left VAT - SMA  | 0.76   |
| Right VAT - IFG | 0.43   |
| Right VAT - SMA | 0.15   |

IFG = inferior frontal gyrus, SMA = pre-supplementary motor area, VAT = volume of activated tissue

For the winning model, there was no significant effect of gender ( $p = 0.55$ ) or disease subtype ( $p = 0.059$ ). The left ( $p = 0.012$ ) hemisphere in isolation evidenced a significant effect but the right ( $p = 0.58$ ) did not.

---

**Supplementary Table 5 | Connectivity Weights in Reward Evaluation Latent Variable  
ELF Rule Violations**

---

| Fibre Tract       | Weight  |
|-------------------|---------|
| Left VTA - VAT    | 0.52    |
| Left VAT - vmPFC  | 0.36    |
| Left VAT - OFC    | -0.0022 |
| Left VAT - VS     | 0.45    |
| Right VTA - VAT   | -0.11   |
| Right VAT - vmPFC | 0.75    |
| Right VAT - OFC   | -1.00   |
| Right VAT - VS    | -0.0076 |

OFC = orbitofrontal cortex, vmPFC = ventromedial prefrontal cortex, VS = ventral striatum, VAT = volume of activated tissue, VTA = ventral tegmental area

For the winning model, there was no significant effect of gender ( $p = 1.0$ ) or disease subtype ( $p = 0.74$ ). Both the left ( $p = 0.043$ ) and the right ( $p = 0.046$ ) hemispheres in isolation evidenced a significant effect.

---

**Supplementary Table 6 | Connectivity Weights in Reward Evaluation Latent Variable**  
**Delay Discount  $k$**

---

| Fibre Tract       | Weight |
|-------------------|--------|
| Left VTA - VAT    | 0.44   |
| Left VAT - vmPFC  | 0.016  |
| Left VAT - OFC    | -0.32  |
| Left VAT - VS     | 0.036  |
| Right VTA - VAT   | 0.79   |
| Right VAT - vmPFC | 0.28   |
| Right VAT - OFC   | 0.30   |
| Right VAT - VS    | -0.56  |

OFC = orbitofrontal cortex, vmPFC = ventromedial prefrontal cortex, VS = ventral striatum, VAT = volume of activated tissue, VTA = ventral tegmental area

For the winning model, there was no significant effect of gender ( $p = 0.85$ ) or disease subtype ( $p = 0.81$ ). Neither the left ( $p = 0.40$ ) nor the right ( $p = 0.071$ ) hemispheres in isolation evidenced a significant effect.



---

**Supplementary Table 7 | Connectivity Weights in Reward Evaluation Latent Variable  
Bet Size**

---

| Fibre Tract       | Weight |
|-------------------|--------|
| Left VTA - VAT    | 0.33   |
| Left VAT - vmPFC  | -1.21  |
| Left VAT - OFC    | 0.52   |
| Left VAT - VS     | 0.47   |
| Right VTA - VAT   | 0.015  |
| Right VAT - vmPFC | 0.54   |
| Right VAT - OFC   | 0.49   |
| Right VAT - VS    | -0.30  |

OFC = orbitofrontal cortex, vmPFC = ventromedial prefrontal cortex, VS = ventral striatum, VAT = volume of activated tissue, VTA = ventral tegmental area

For the winning model, there was no significant effect of gender ( $p = 0.53$ ) or disease subtype ( $p = 0.054$ ). Neither the left ( $p = 0.17$ ) nor the right ( $p = 0.086$ ) hemisphere in isolation evidenced a significant effect.

-

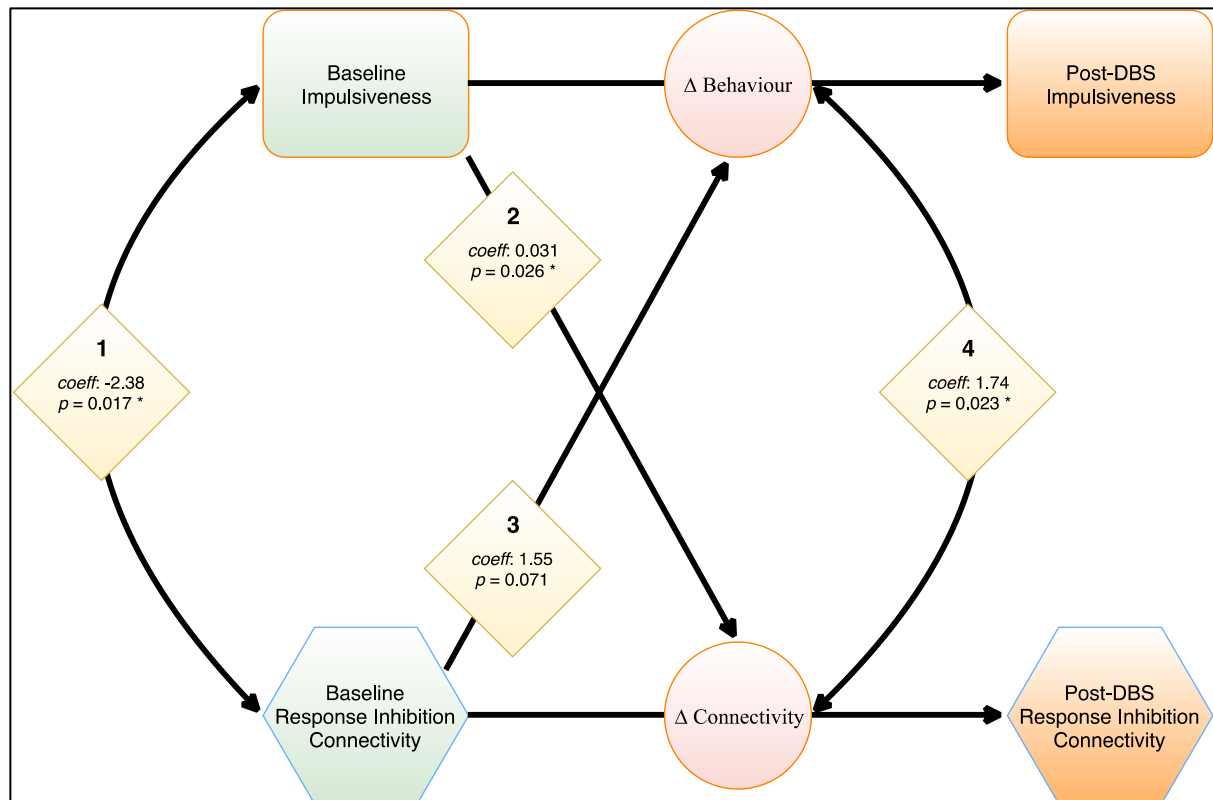

**Supplementary Figure 4 | Cross Lagged Model Results: BIS**

Coefficients:

1. Connectivity-behaviour covariance at baseline ( $Connectivity_{t1} \sim Behaviour_{t1}$ )
2. Behaviour to connectivity coupling ( $Behaviour_{t1} \rightarrow \Delta Connectivity$ )
3. Connectivity to behaviour coupling ( $Connectivity_{t1} \rightarrow \Delta Behaviour$ )
4. Correlated change in connectivity and behaviour ( $\Delta Connectivity \sim \Delta Behaviour$ )

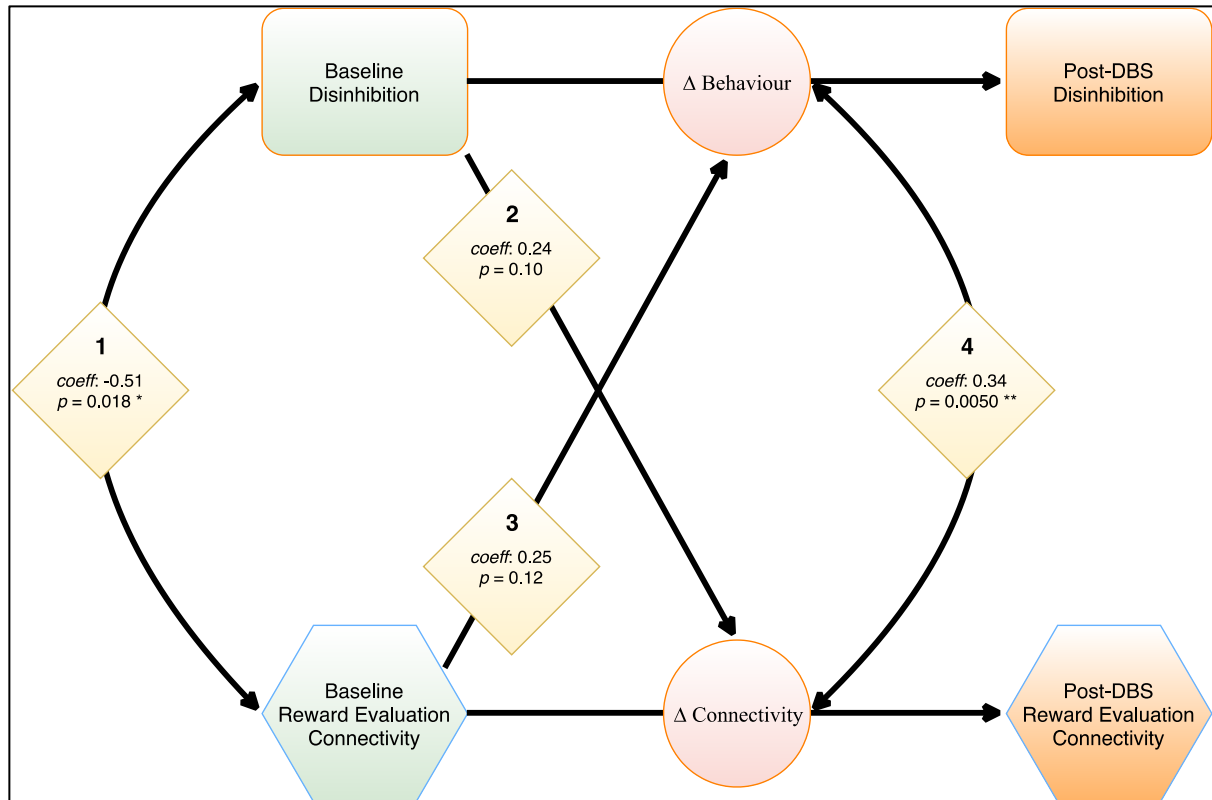

**Supplementary Figure 5 | Cross Lagged Model Results: ELF Rule Violations**

Coefficients:

1. Connectivity-behaviour covariance at baseline ( $Connectivity_{t1} \sim Behaviour_{t1}$ )
2. Behaviour to connectivity coupling ( $Behaviour_{t1} \rightarrow \Delta Connectivity$ )
3. Connectivity to behaviour coupling ( $Connectivity_{t1} \rightarrow \Delta Behaviour$ )
4. Correlated change in connectivity and behaviour ( $\Delta Connectivity \sim \Delta Behaviour$ )

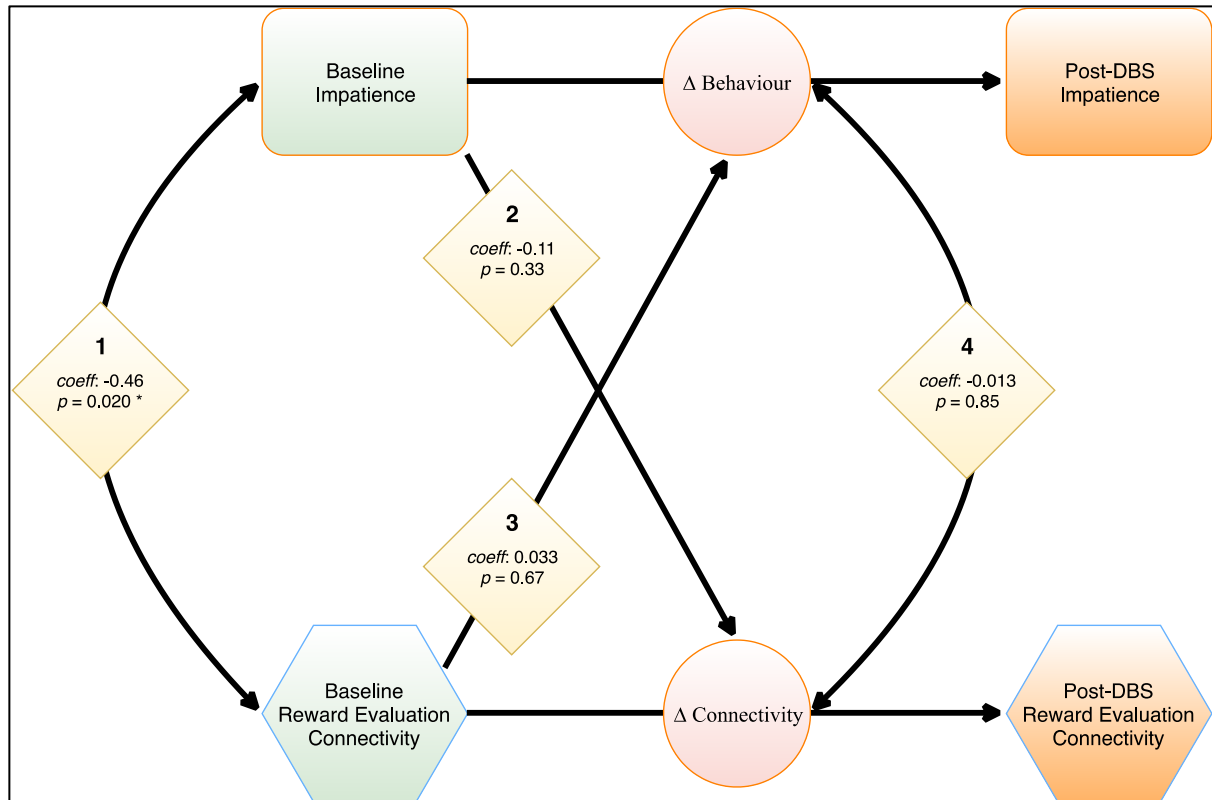

**Supplementary Figure 6 | Cross Lagged Model Results: Delay Discount  $k$**

Coefficients:

1. Connectivity-behaviour covariance at baseline ( $Connectivity_{t1} \sim Behaviour_{t1}$ )
2. Behaviour to connectivity coupling ( $Behaviour_{t1} \rightarrow \Delta Connectivity$ )
3. Connectivity to behaviour coupling ( $Connectivity_{t1} \rightarrow \Delta Behaviour$ )
4. Correlated change in connectivity and behaviour ( $\Delta Connectivity \sim \Delta Behaviour$ )

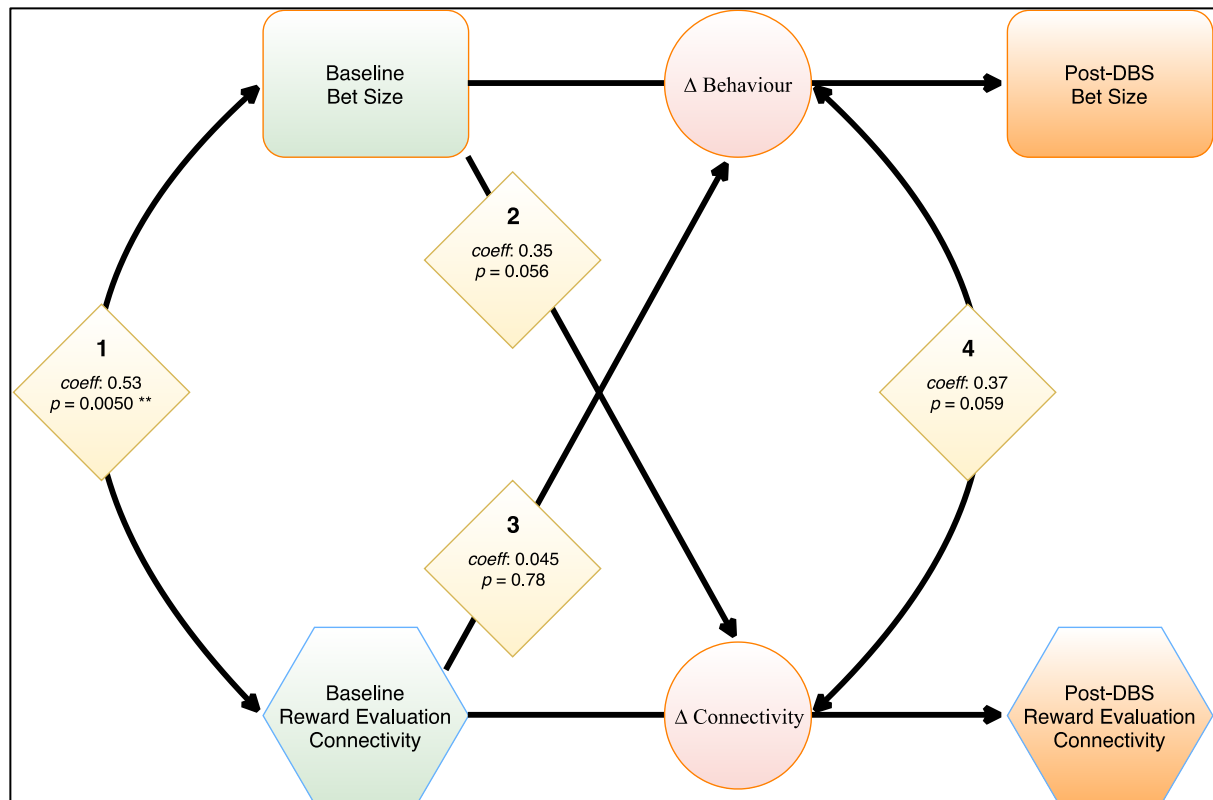

**Supplementary Figure 7 | Cross Lagged Model Results: Bet Size**

Coefficients:

1. Connectivity-behaviour covariance at baseline ( $Connectivity_{t1} \sim Behaviour_{t1}$ )
2. Behaviour to connectivity coupling ( $Behaviour_{t1} \rightarrow \Delta Connectivity$ )
3. Connectivity to behaviour coupling ( $Connectivity_{t1} \rightarrow \Delta Behaviour$ )
4. Correlated change in connectivity and behaviour ( $\Delta Connectivity \sim \Delta Behaviour$ )

**Supplementary Table 8 | Correlation of Postoperative Motor Symptoms with Neuropsychiatric Variables & Gambling Behaviours**

| Neuropsychiatric & Gambling Variables Assessed Post-DBS |                                                                            |
|---------------------------------------------------------|----------------------------------------------------------------------------|
| Assessment Instrument                                   | Pearson Correlation with Post-DBS UPDRS Score †<br>Degrees of Freedom = 53 |
| BIS                                                     | $r = 0.41$<br>$corr. p = 0.0048 **$                                        |
| QUIP-RS Total                                           | $r = 0.072$<br>$corr. p = 0.80$                                            |
| Delay Discount $k$                                      | $r = -0.14$<br>$corr. p = 0.46$                                            |
| Hayling AB Error Score                                  | $r = 0.42$<br>$corr. p = 0.0048 **$                                        |
| ELF Rule Violations                                     | $r = -0.20$<br>$corr. p = 0.28$                                            |
| Virtual Casino                                          | Pearson Correlation with Post-DBS UPDRS Score †<br>Degrees of Freedom = 53 |
| Average Bet Size (AUD)                                  | $r = 0.040$<br>$corr. p = 0.88$                                            |
| Double or Nothing Gamble (Percent)                      | $r = 0.42$<br>$corr. p = 0.0048 **$                                        |

† FDR-corrected with Benjamini and Hochberg method (1995), with  $\alpha = 0.05$ .

\* $p < 0.05$ . \*\* $p < 0.01$ . \*\*\* $p < 0.001$

BIS = Barratt Impulsiveness Scale; ELF = Excluded Letter Fluency Task; QUIP-RS = Questionnaire for Impulsive-Compulsive disorders in PD Rating Scale; UPDRS = Unified Parkinson's Disease Rating Scale Part III Motor Examination

**Supplementary Table 9 | Modelling of Motor, Neuropsychiatric & Gambling Outcomes  
Related to Focal Stimulation of the Subthalamic Nucleus**

| <b>Motor, Neuropsychiatric &amp; Gambling Variables Assessed Post-DBS</b>                 |                                                                                                                                                                                                                                                                                     |
|-------------------------------------------------------------------------------------------|-------------------------------------------------------------------------------------------------------------------------------------------------------------------------------------------------------------------------------------------------------------------------------------|
| <b>Assessment Instrument</b>                                                              | <b>Anatomical Variables After Optimisation</b>                                                                                                                                                                                                                                      |
| <b>BIS</b>                                                                                | Nil                                                                                                                                                                                                                                                                                 |
| <b>QUIP-RS Total</b>                                                                      | Nil                                                                                                                                                                                                                                                                                 |
| <b>Delay Discount <i>k</i></b>                                                            | Nil                                                                                                                                                                                                                                                                                 |
| <b>Hayling AB Error Score</b>                                                             | Nil                                                                                                                                                                                                                                                                                 |
| <b>ELF Rule Violations</b>                                                                | Nil                                                                                                                                                                                                                                                                                 |
| <b>Virtual Casino</b>                                                                     | <b>Anatomical Variables After Optimisation</b>                                                                                                                                                                                                                                      |
| <b>Average Bet Size (AUD)</b>                                                             | Nil                                                                                                                                                                                                                                                                                 |
| <b>Double or Nothing Gamble (Percent)</b>                                                 | Nil                                                                                                                                                                                                                                                                                 |
| <b>Motor Symptoms</b>                                                                     | <b>Anatomical Variables After Optimisation</b>                                                                                                                                                                                                                                      |
| <b>Percentage Reduction UPDRS Part III Scores 'On' Stimulation Versus 'On' Medication</b> | Distance: Left Motor STN Centroid<br>LASSO Intercept = 25.67<br>LASSO Coefficient = -4.56<br>GLM $z = -8.63$<br>GLM $p = 0.0025$ **<br><br>Dispersion of Stimulation: Left Motor STN<br>LASSO Intercept = 25.67<br>LASSO Coefficient = 0.046<br>GLM $z = 0.37$<br>GLM $p = 0.018$ * |

\* $p < 0.05$ . \*\* $p < 0.01$ . \*\*\* $p < 0.001$

BIS = Barratt Impulsiveness Scale; ELF = Excluded Letter Fluency Task; ICB = Impulse Control Behaviours; QUIP-RS = Questionnaire for Impulsive-Compulsive disorders in PD Rating Scale; UPDRS = Unified Parkinson's Disease Rating Scale Part III Motor Examination

**Supplementary Table 10 | Differences in Focal Subthalamic Stimulation between Case Positive and Case Negative Participants**

| Subthalamic Subregion Stimulation (Affective, Associative, Motor) |                                        |
|-------------------------------------------------------------------|----------------------------------------|
| Distance of Active Contact to Centre of STN Subregion             | Case+ vs. Case- †                      |
| Distance to Left Affective Centroid                               | $t = 1.26$<br>$corr. p = 0.38$         |
| Distance to Right Affective Centroid                              | $t = 3.40$<br>$corr. p = 0.0080 **$    |
| Distance to Left Associative Centroid                             | $t = 0.80$<br>$corr. p = 0.57$         |
| Distance to Right Associative Centroid                            | $t = 1.06$<br>$corr. p = 0.45$         |
| Distance to Left Motor Centroid                                   | $t = -2.09$<br>$corr. p = 0.092$       |
| Distance to Right Motor Centroid                                  | $t = -4.67$<br>$corr. p = 0.00030 ***$ |
| Distribution of VAT Within STN Subregion                          | Case+ vs. Case- †                      |
| VAT Overlap Left Affective Subregion                              | $t = 0.32$<br>$corr. p = 0.85$         |
| VAT Overlap Right Affective Subregion                             | $t = -0.74$<br>$corr. p = 0.93$        |
| VAT Overlap Left Associative Subregion                            | $t = -0.089$<br>$corr. p = 0.93$       |
| VAT Overlap Right Associative Subregion                           | $t = -0.29$<br>$corr. p = 0.85$        |
| VAT Overlap Left Motor Subregion                                  | $t = 2.18$<br>$corr. p = 0.092$        |
| VAT Overlap Right Motor Subregion                                 | $t = 3.80$<br>$corr. p = 0.0031 **$    |

† FDR-corrected with Benjamini and Hochberg method (1995), with  $\alpha = 0.05$ .

\* $p < 0.05$ . \*\* $p < 0.01$ . \*\*\* $p < 0.001$

VAT = Volume of Activated Tissue



**Supplementary Table 11 | Differences in Frontostriatal Connectivity between Case Positive and Case Negative Participants**

| Frontostriatal Connectivity with the Subthalamic Stimulation Field |                                 |
|--------------------------------------------------------------------|---------------------------------|
| Response Inhibition Network                                        | Case+ vs. Case- †               |
| Left VAT - IFG                                                     | $t = 0.77$<br>$corr. p = 0.63$  |
| Left VAT - SMA                                                     | $t = 1.23$<br>$corr. p = 0.63$  |
| Right VAT - IFG                                                    | $t = 1.18$<br>$corr. p = 0.63$  |
| Right VAT - SMA                                                    | $t = 0.83$<br>$corr. p = 0.63$  |
| Reward Evaluation Network                                          | Case+ vs. Case- †               |
| Left VTA - VAT                                                     | $t = 1.32$<br>$corr. p = 0.63$  |
| Left VAT - vmPFC                                                   | $t = 0.055$<br>$corr. p = 0.96$ |
| Left VAT - OFC                                                     | $t = 0.58$<br>$corr. p = 0.68$  |
| Left VAT - VS                                                      | $t = -0.91$<br>$corr. p = 0.63$ |
| Right VTA - VAT                                                    | $t = 0.73$<br>$corr. p = 0.63$  |
| Right VAT - vmPFC                                                  | $t = -0.11$<br>$corr. p = 0.96$ |
| Right VAT - OFC                                                    | $t = 0.76$<br>$corr. p = 0.63$  |
| Right VAT - VS                                                     | $t = 0.92$<br>$corr. p = 0.63$  |

† FDR-corrected with Benjamini and Hochberg method (1995), with  $\alpha = 0.05$ .

\* $p < 0.05$ . \*\* $p < 0.01$ . \*\*\* $p < 0.001$

VAT = Volume of Activated Tissue

**Supplementary Table 12 | Differences in Local Subthalamic Stimulation between Cases at Onset of Neuropsychiatric Symptoms and after Remission due to Changed Stimulation**

| Subthalamic Subregion Stimulation (Affective, Associative, Motor) |                                 |
|-------------------------------------------------------------------|---------------------------------|
| Distance of Active Contact to Centre of STN Subregion             | Active vs. Remitted Symptoms †  |
| Distance to Left Affective Centroid                               | $t = -1.36$<br>$corr. p = 0.48$ |
| Distance to Right Affective Centroid                              | $t = -1.03$<br>$corr. p = 0.50$ |
| Distance to Left Associative Centroid                             | $t = -1.05$<br>$corr. p = 0.50$ |
| Distance to Right Associative Centroid                            | $t = 2.08$<br>$corr. p = 0.32$  |
| Distance to Left Motor Centroid                                   | $t = -0.58$<br>$corr. p = 0.74$ |
| Distance to Right Motor Centroid                                  | $t = 1.33$<br>$corr. p = 0.48$  |
| Distribution of VAT Within STN Subregion                          | Active vs. Remitted Symptoms †  |
| VAT Overlap Left Affective Subregion                              | $t = -0.21$<br>$corr. p = 0.86$ |
| VAT Overlap Right Affective Subregion                             | $t = 2.48$<br>$corr. p = 0.14$  |
| VAT Overlap Left Associative Subregion                            | $t = 0.18$<br>$corr. p = 0.86$  |
| VAT Overlap Right Associative Subregion                           | $t = -1.55$<br>$corr. p = 0.48$ |
| VAT Overlap Left Motor Subregion                                  | $t = -0.51$<br>$corr. p = 0.74$ |
| VAT Overlap Right Motor Subregion                                 | $t = 1.01$<br>$corr. p = 0.50$  |

† FDR-corrected with Benjamini and Hochberg method (1995), with  $\alpha = 0.05$ .

\* $p < 0.05$ . \*\* $p < 0.01$ . \*\*\* $p < 0.001$

VAT = Volume of Activated Tissue

**Supplementary Table 13 | Differences in Frontostriatal Connectivity between Cases at Onset of Neuropsychiatric Symptoms and after Remission due to Changed Stimulation**

| Frontostriatal Connectivity with the Subthalamic Stimulation Field |                                   |
|--------------------------------------------------------------------|-----------------------------------|
| Response Inhibition Network                                        | Active vs. Remitted Symptoms †    |
| Left VAT - IFG                                                     | $t = -0.41$<br>$corr. p = 0.92$   |
| Left VAT - SMA                                                     | $t = 0.45$<br>$corr. p = 0.92$    |
| Right VAT - IFG                                                    | $t = -0.029$<br>$corr. p = 0.98$  |
| Right VAT - SMA                                                    | $t = 0.78$<br>$corr. p = 0.92$    |
| Reward Evaluation Network                                          | Active vs. Remitted Symptoms †    |
| Left VTA - VAT                                                     | $t = 0.48$<br>$corr. p = 0.72$    |
| Left VAT - vmPFC                                                   | $t = -0.86$<br>$corr. p = 0.56$   |
| Left VAT - OFC                                                     | $t = 0.82$<br>$corr. p = 0.56$    |
| Left VAT - VS                                                      | $t = 0.87$<br>$corr. p = 0.56$    |
| Right VTA - VAT                                                    | $t = -0.37$<br>$corr. p = 0.72$   |
| Right VAT - vmPFC                                                  | $t = -0.89$<br>$corr. p = 0.56$   |
| Right VAT - OFC                                                    | $t = 3.26$<br>$corr. p = 0.039 *$ |
| Right VAT - VS                                                     | $t = 2.09$<br>$corr. p = 0.21$    |

† FDR-corrected with Benjamini and Hochberg method (1995), with  $\alpha = 0.05$ .

\* $p < 0.05$ . \*\* $p < 0.01$ . \*\*\* $p < 0.001$

VAT = Volume of Activated Tissue

## REFERENCES

Benjamini, Y., Hochberg, Y., 1995. Controlling the False Discovery Rate: A Practical and Powerful Approach to Multiple Testing. *Journal of the Royal Statistical Society. Series B (Methodological)*. 57, 289-300.

Mosley, P.E., Smith, D., Coyne, T., Silburn, P., Breakspear, M., Perry, A., 2018. The site of stimulation moderates neuropsychiatric symptoms after subthalamic deep brain stimulation for Parkinson's disease. *NeuroImage: Clinical*. 18, 996-1006.

Mosley, P.E., Robinson, K., Coyne, T., Silburn, P., Breakspear, M., Carter, A., 2019. 'Woe betides anybody who tries to turn me down.' A qualitative analysis of neuropsychiatric symptoms following subthalamic deep brain stimulation for Parkinson's disease. *Neuroethics*. 10.1007/s12152-019-09410-x.
